# Supplementary material for: Inhibition of the Polyamine Synthesis Pathway Is Synthetically Lethal with Loss of Argininosuccinate Synthase 1
Source: PubMed Central journal article supplement — Cell Rep. 2016 Jul 21;16(6):1604–13. doi: 10.1016/j.celrep.2016.06.097 (PMC4978703; doi:10.1016/j.celrep.2016.06.097), 2016-07-21

**Cell Reports, Volume 16**

**Supplemental Information**

**Inhibition of the Polyamine Synthesis Pathway**

**Is Synthetically Lethal**

**with Loss of Argininosuccinate Synthase 1**

**Matthew Locke, Essam Ghazaly, Marta O. Freitas, Mikaella Mitsinga, Laura Lattanzio, Cristiana Lo Nigro, Ai Nagano, Jun Wang, Claude Chelala, Peter Szlosarek, and Sarah A. Martin**

## SUPPLEMENTAL DATA

### **FIGURE S1. Methylation of the ASS1 gene sensitizes MPM cells to ADI-PEG20. Related to Figure 1.**

(A) Methylation analysis across 7 CpG islands in the ASS1 promoter. Genomic DNA was extracted from the ASS1-ve Ju77, MSTO cells and the ASS1+ve, H28, H226 cells, and bisulphite converted. DNA was pyrosequenced across 7 CpG islands in the ASS1 promoter.

(B) The ASS1-methylated Ju77 and MSTO cells and the ASS1-proficient H226 and H28 MPM cells were treated with increasing concentrations of ADI-PEG20 (0, 1, 10, 100, 1000 & 10,000 ng/ml). After 4 days treatment, cell viability was measured using an ATP-based luminescence assay.

### **FIGURE S2. Metabolomics analysis of ASS1-deficient cells and patient plasma samples. Related to Figure 2 & 3.**

(A) Principle Component Analysis (PCA) score plot for ADI-PEG20-sensitive, Ju77S (JS) and the ADI-PEG20-resistant Ju77R (JR) MPM cells, extracted and analysed by UPLC-MS over 5 different days (D1-D5). PC1 = 41.7% and PC2 = 24.4%.

(B) Two component orthogonal partial least squares discriminant analysis (OPLS-DA) plot showing sample clustering according to ADI-PEG20 treatment in plasma samples obtained from week 6 and 7 of treatment cycles *versus* pre-treatment samples. There was a clear separation based on ADI-PEG20 treatment with reproducible metabolomic changes.

### **FIGURE S3. Gene Expression analysis of the Ju77S and Ju77R cells. Related to Figure 4.**

Gene expression heat map from microarray analysis of the Ju77S and Ju77R cells. Individual RNA replicates are represented as columns.

# SUPPLEMENTAL FIGURE 1

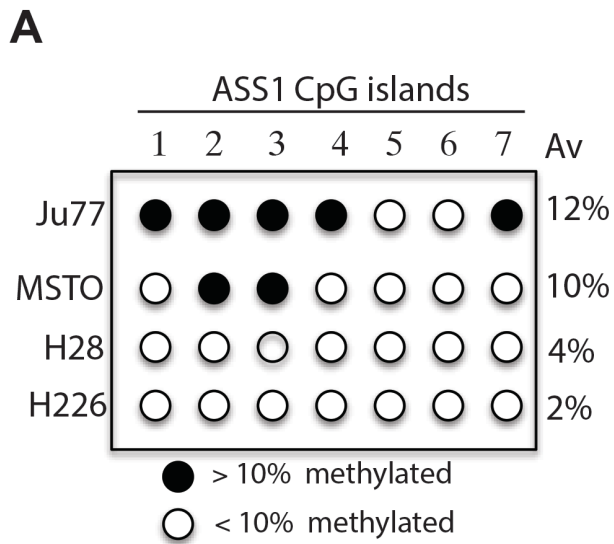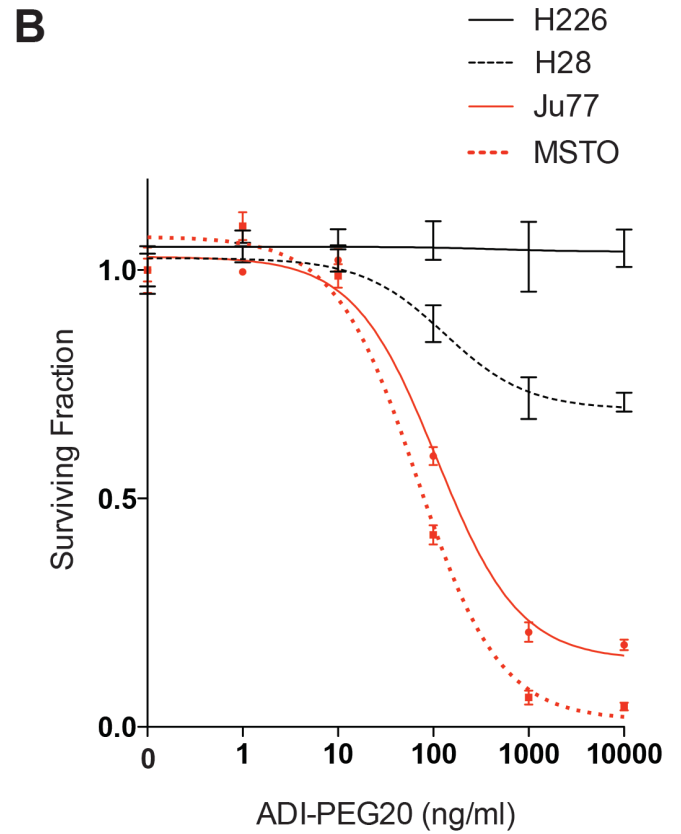

# SUPPLEMENTAL FIGURE 2

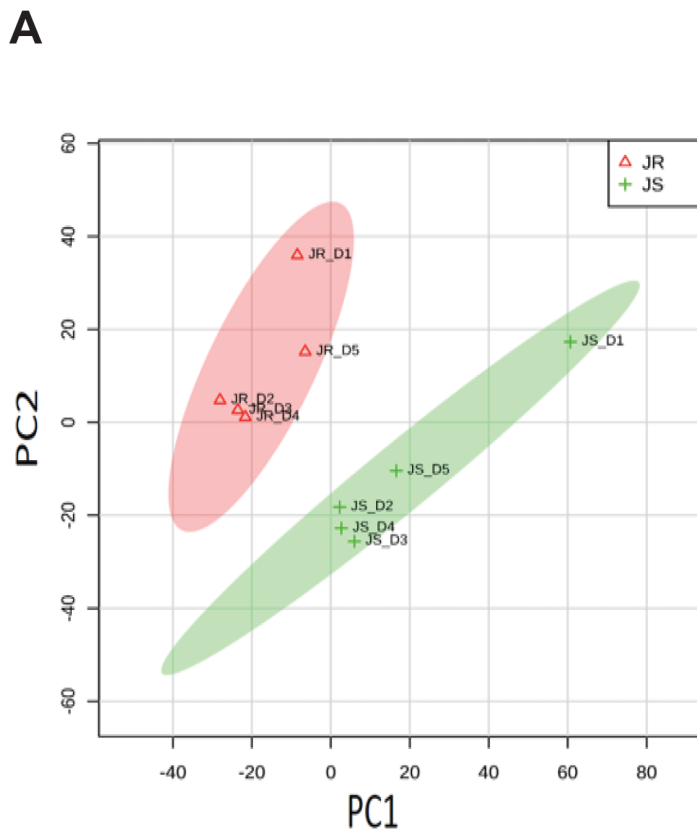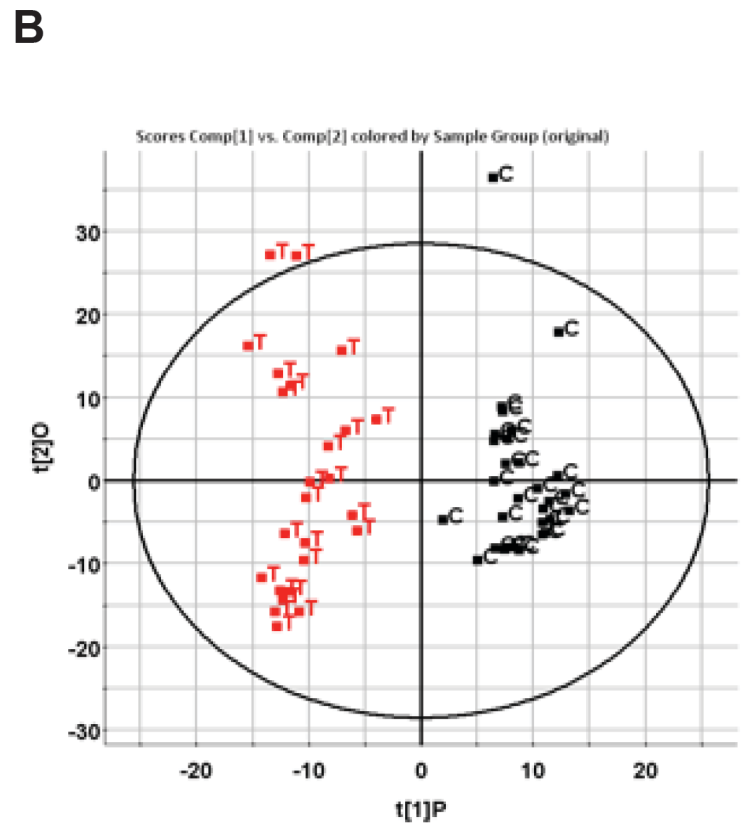

# SUPPLEMENTAL FIGURE 3

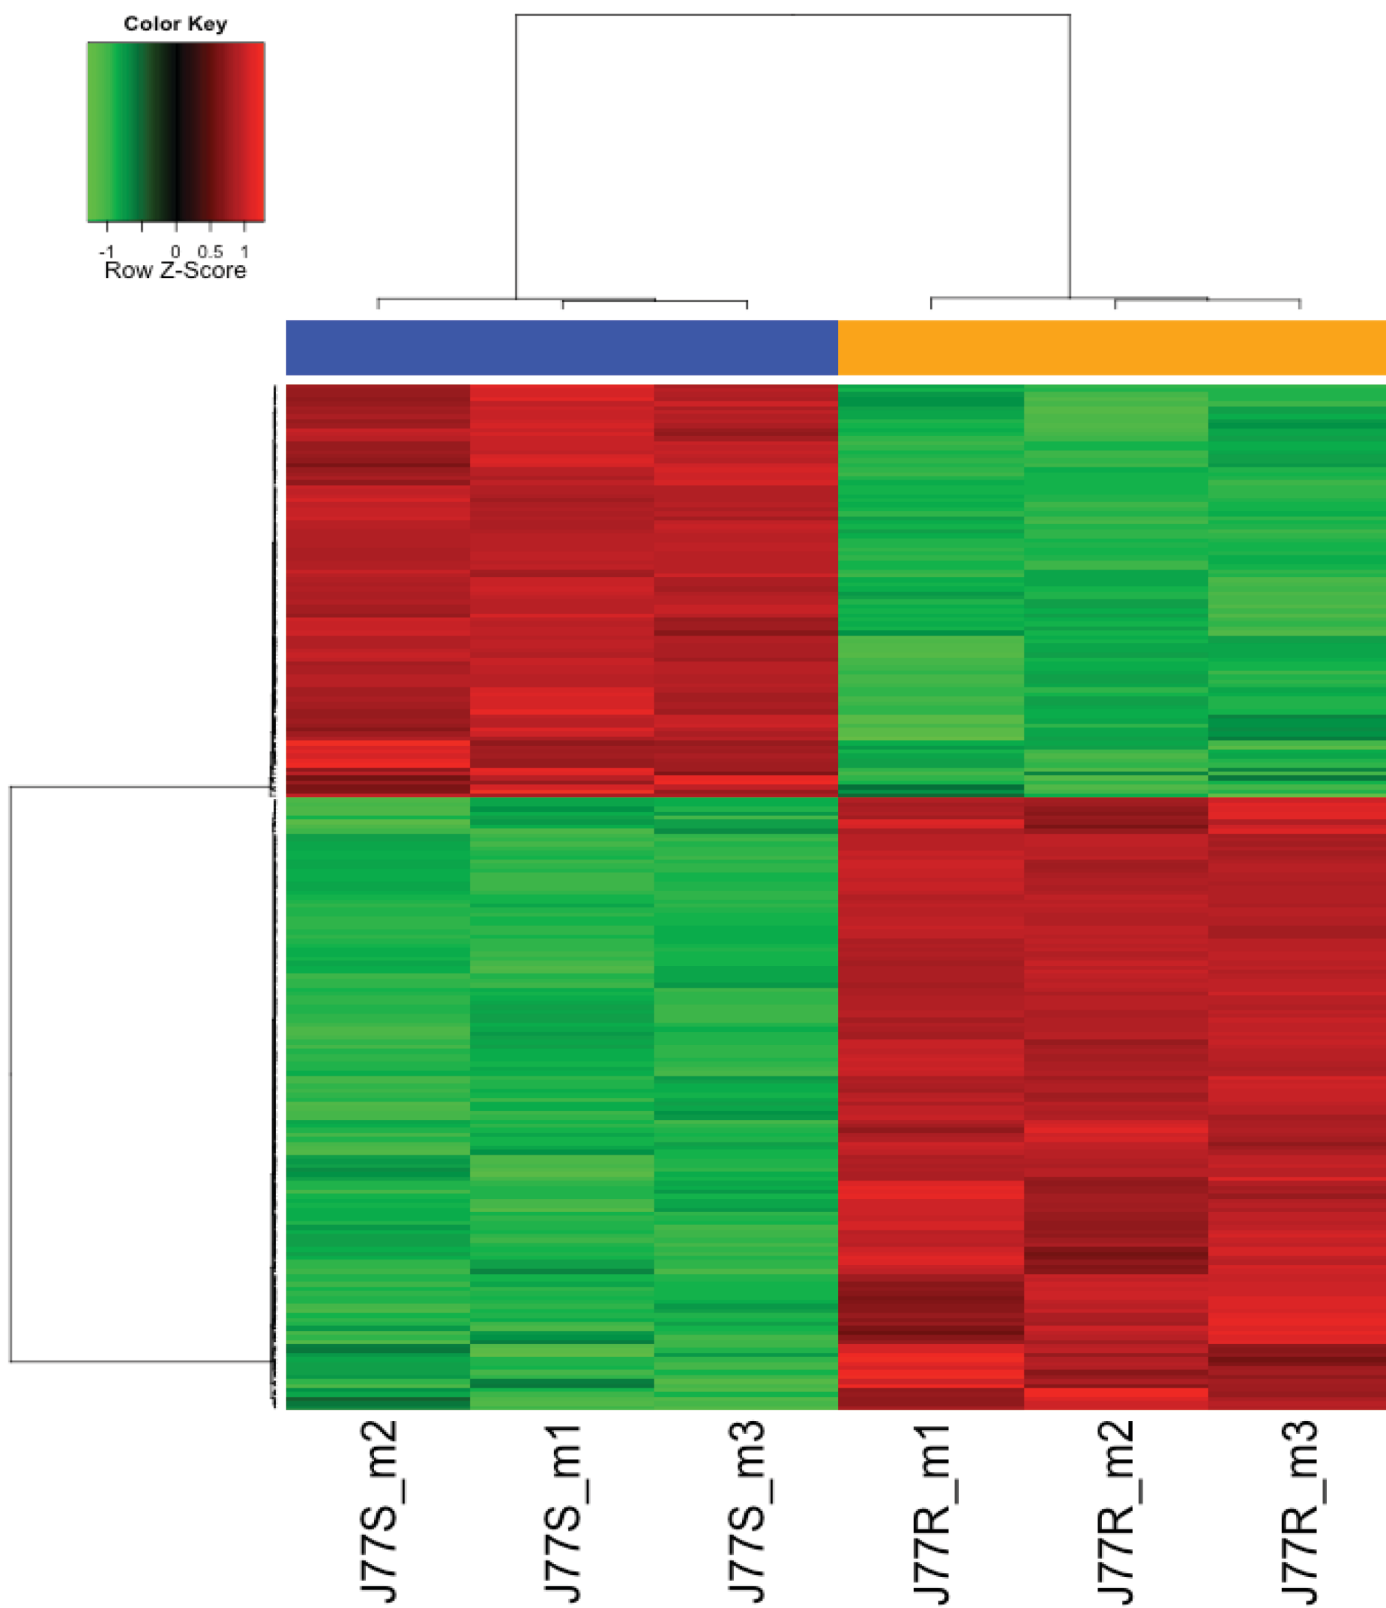

Supplement: mmc1.pdf [file mmc1.pdf]
